# Supplementary material for: Complete Mitochondrial Genomes of Carcinoscorpius rotundicauda and Tachypleus tridentatus (Xiphosura, Arthropoda) and Implications for Chelicerate Phylogenetic Studies
Source: PubMed Central journal article supplement — Int J Biol Sci. 2014 Apr 16;10(5):479–89. doi: 10.7150/ijbs.8739 (PMC4007361; doi:10.7150/ijbs.8739), 2014-04-16
Supplement: ijbsv10p0479s1.pdf [file ijbsv10p0479s1.pdf]

**Supplementary Table I** Comparison of whole genome sizes and A + T contents, and GenBank accession numbers of the mitochondrial genomes for 44 chelicerates.

| Species                             | Total       |           | 13 PCGs     |           | 16S rRNA gene |           | 12S rRNA gene |           | Accession Numbers |
|-------------------------------------|-------------|-----------|-------------|-----------|---------------|-----------|---------------|-----------|-------------------|
|                                     | Length (bp) | A + T (%) | Length (bp) | A + T (%) | Length (bp)   | A + T (%) | Length (bp)   | A + T (%) |                   |
| <b>Class Merostomata</b>            |             |           |             |           |               |           |               |           |                   |
| <b>Order Xiphosura</b>              |             |           |             |           |               |           |               |           |                   |
| <i>Carcinoscorpius rotundicauda</i> | 15,033      | 73.8      | 11,072      | 73.1      | 1,301         | 75.7      | 816           | 73.9      | In this study     |
| <i>Tachypleus tridentatus</i> I     | 15,006      | 74.0      | 11,062      | 73.5      | 1,294         | 75.7      | 800           | 74.5      | In this study     |
| <i>Tachypleus tridentatus</i> II    | 15,008      | 74.0      | 11,075      | 73.5      | 1,294         | 75.6      | 803           | 74.8      | NC_012574.1       |
| <i>Limulus polyphemus</i>           | 14,985      | 67.6      | 11,077      | 66.4      | 1,296         | 67.4      | 799           | 66.6      | NC_003057.1       |
| <b>Class Pycnogonida</b>            |             |           |             |           |               |           |               |           |                   |
| <b>Order Pantopoda</b>              |             |           |             |           |               |           |               |           |                   |
| <i>Achelia bituberculata</i>        | 15,474      | 77.0      | 10,991      | 75.9      | 1,210         | 78.9      | 776           | 78.4      | NC_009724.1       |
| <i>Ammothea carolinensis</i>        | 15,101      | 80.4      | 11,113      | 79.4      | 1,213         | 81.6      | 830           | 82.1      | NC_014671.1       |
| <i>Nymphon gracile</i>              | 14,681      | 77.3      | 10,930      | 76.6      | 1,196         | 79.3      | 767           | 75.5      | NC_008572.1       |
| <i>Tanystylum orbiculare</i>        | 15,251      | 80.0      | 11,091      | 79.0      | 1,193         | 82.1      | 824           | 79.6      | NC_014505.1       |
| <b>Class Arachnida</b>              |             |           |             |           |               |           |               |           |                   |
| <b>Order Scorpiones</b>             |             |           |             |           |               |           |               |           |                   |
| <i>Buthus occitanus</i>             | 15,060      | 67.8      | 9,937       | 66.3      | 1,151         | 74.1      | 796           | 72.6      | NC_014505.1       |
| <i>Mesobuthus martensii</i>         | 15,034      | 66.8      | 10,808      | 65.6      | 1,139         | 72.3      | 751           | 71.1      | NC_009738.1       |
| <i>Centruroides limpidus</i>        | 14,519      | 60.2      | 10,848      | 63.0      | 1,132         | 68.8      | 727           | 68.1      | NC_006896.1       |
| <i>Uroctonus mordax</i>             | 14,840      | 74.0      | 10,921      | 73.7      | 1,178         | 78.1      | 792           | 77.7      | NC_010782.1       |
| <b>Order Araneae</b>                |             |           |             |           |               |           |               |           |                   |
| <i>Habronattus oregonensis</i>      | 14,381      | 69.4      | 10,756      | 73.8      | 1,018         | 75.2      | 691           | 74.0      | NC_005942.1       |
| <i>Nephila clavata</i>              | 14,436      | 76.0      | 10,729      | 74.9      | 1,046         | 79.1      | 695           | 78.4      | NC_008063.1       |
| <i>Hypochilus thorelli</i>          | 13,991      | 70.3      | 10,753      | 69.0      | 1,041         | 75.4      | 688           | 75.2      | NC_010777.1       |
| <i>Aphonopelma</i> sp. 1            | 14,070      | 64.0      | 10,738      | 63.1      | 1,062         | 67.3      | 691           | 66.0      | EU_523754.1       |
| <i>Calisoga longitarsis</i>         | 14,070      | 64.0      | 10,738      | 63.1      | 1,062         | 67.3      | 691           | 66.0      | NC_010780.1       |
| <i>Heptathela hangzhouensis</i>     | 14,215      | 67.5      | 10,765      | 71.5      | 1,119         | 72.1      | 698           | 69.0      | NC_005924.1       |
| <i>Ornithoctonus huwena</i>         | 13,874      | 65.2      | 10,890      | 71.4      | 1,048         | 66.5      | 666           | 67.9      | NC_005925.1       |
| <b>Order Solifugae</b>              |             |           |             |           |               |           |               |           |                   |
| <i>Eremobates cf. alpisetulosus</i> | 15,083      | 68.7      | 10,945      | 68.5      | 1,248         | 69.6      | 729           | 68.2      | NC_010779.1       |
| <i>Nothopuga</i> sp. 1              | 14,985      | 69.2      | 9,386       | 69.0      | 1,219         | 71.8      | 725           | 69.7      | NC_009984.1       |
| <b>Order Opiliones</b>              |             |           |             |           |               |           |               |           |                   |
| <i>Opilio parietinus</i>            | 15,400      | 72.3      | 10,955      | 70.3      | 1,242         | 77.5      | 786           | 74.8      | NC_014700.1       |
| <i>Phalangium opilio</i>            | 14,968      | 71.8      | 10,921      | 69.9      | 1,243         | 78.0      | 790           | 74.6      | NC_010766.1       |
| <b>Order Amblypygi</b>              |             |           |             |           |               |           |               |           |                   |
| <i>Damon diadema</i>                | 14,786      | 63.2      | 10,959      | 62.2      | 1,294         | 65.0      | 750           | 61.9      | NC_011293.1       |
| <i>Phrynus</i> sp. 1                | 14,764      | 67.5      | 11,975      | 66.9      | 1,211         | 68.9      | 786           | 64.9      | NC_010775.1       |
| <b>Order Ricinulei</b>              |             |           |             |           |               |           |               |           |                   |
| <i>Pseudocellus pearsei</i>         | 15,099      | 69.1      | 10,823      | 67.7      | 1,250         | 73.2      | 743           | 69.7      | NC_009985.1       |
| <b>Order Uropygi</b>                |             |           |             |           |               |           |               |           |                   |
| <i>Mastigoproctus giganteus</i>     | 14,416      | 70.6      | 10,847      | 69.5      | 1,170         | 75.6      | 774           | 76.0      | NC_010430.1       |
| <b>Order Pseudoscorpiones</b>       |             |           |             |           |               |           |               |           |                   |
| <i>Pseudogarypus banksi</i>         | 16,546      | 76.8      | 11,301      | 75.8      | 987           | 78.0      | 700           | 78.4      | NC_017753.1       |
| <i>Paratemnooides elongatus</i>     | 14,368      | 73.9      | 10,581      | 72.9      | 1,014         | 76.1      | 728           | 75.6      | NC_017752.1       |
| <b>Order Acari</b>                  |             |           |             |           |               |           |               |           |                   |
| <i>Ascoschoengastia</i> sp.         | 16,067      | 70.1      | 10,560      | 69.3      | 1,047         | 76.3      | 680           | 72.8      | NC_010596.1       |
| <i>Leptotrombidium pallidum</i>     | 16,799      | 71.0      | 10,312      | 71.4      | 1,008         | 74.9      | 601           | 72.1      | NC_007177.1       |
| <i>Unionicola parkeri</i>           | 14,734      | 72.8      | 10,799      | 72.1      | 1,017         | 77.0      | 653           | 72.4      | NC_014683.1       |
| <i>Walchia hayashii</i>             | 14,857      | 73.0      | 10,574      | 73.0      | 1,045         | 77.4      | 625           | 75.0      | NC_010595.1       |
| <i>Dermatophagoides farinae</i>     | 14,266      | 71.4      | 10,848      | 70.4      | 1,017         | 72.3      | 661           | 72.0      | NC_013184.1       |
| <i>Amblyomma triguttatum</i>        | 14,740      | 73.2      | 10,876      | 78.3      | 1,199         | 77.9      | 693           | 75.9      | NC_005963.1       |
| <i>Carios capensis</i>              | 14,418      | 68.7      | 10,873      | 72.7      | 1,225         | 74.3      | 695           | 72.9      | NC_005291.1       |
| <i>Haemaphysalis flava</i>          | 14,686      | 71.8      | 10,818      | 76.7      | 1,196         | 77.7      | 699           | 75.0      | NC_005292.1       |
| <i>Ixodes hexagonus</i>             | 14,539      | 67.9      | 10,826      | 71.1      | 1,287         | 73.2      | 705           | 75.0      | NC_002010.1       |
| <i>Ornithodoros porcinus</i>        | 14,378      | 71.0      | 10,877      | 70.1      | 1,207         | 74.5      | 691           | 74.4      | NC_005820.1       |
| <i>Rhipicephalus sanguineus</i>     | 14,710      | 72.8      | 10,803      | 78.0      | 1,190         | 77.5      | 687           | 75.7      | NC_002074.1       |
| <i>Stegannacarus magnus</i>         | 13,818      | 74.6      | 10,560      | 74.4      | 992           | 76.5      | 609           | 74.4      | NC_011574.1       |
| <i>Phytoseiulus persimilis</i>      | 16,199      | 79.8      | 10,877      | 79.4      | 1,199         | 82.9      | 711           | 81.6      | NC_014049.1       |
| <i>Stylochytrus rarior</i>          | 14,900      | 72.7      | 10,839      | 71.3      | 1,200         | 76.7      | 653           | 75.3      | NC_013474.2       |
| <i>Varroa destructor</i>            | 16,477      | 74.6      | 10,783      | 79.2      | 1,149         | 79.1      | 726           | 76.7      | NC_004454.2       |
| <b>Average values</b>               | 14,849      | 71.3      | 10,823      | 71.7      | 1,156         | 74.9      | 725           | 73.3      |                   |
